# Supplementary material
Source: PubMed Central journal article supplement (PMC6830793)

## SUPPLEMENTAL MATERIAL

### ***Pharmacological Npt2a inhibition causes phosphaturia and reduces plasma phosphate in mice with normal and reduced kidney function***

**Linto Thomas<sup>1</sup>, Jianxiang Xue<sup>1</sup>, Sathish Kumar Murali<sup>2</sup>, Robert A. Fenton<sup>2</sup>, Jessica A. Dominguez Rieg<sup>1</sup> and Timo Rieg<sup>1</sup>**

<sup>1</sup>Department of Molecular Pharmacology and Physiology, University of South Florida, Tampa, FL 33612, USA.

<sup>2</sup>Department of Biomedicine, Aarhus University, Aarhus DK-8000, Denmark.

#### TABLE OF CONTENTS

Supplemental Figure 1-7

#### SUPPLEMENTAL FIGURE LEGENDS

**Supplemental Figure 1. Percent change in urinary parameters in response to Npt2a inhibition.** Response to acute oral (p.o.) application of Npt2a-I (0.3-300 mg\*kg<sup>-1</sup> via oral gavage) or vehicle in short-term (3 hour) metabolic cage experiments. (A) Phosphate, (B) calcium, (C) sodium, (D) chloride, (E) potassium, (F) glucose, (G) amino acids and (H) urinary flow rate. Data are expressed as mean±S.E.M,  $n=6-14/0.3-100$  mg\*kg<sup>-1</sup>,  $n=3$  for 300 mg\*kg<sup>-1</sup>.

**Supplemental Figure 2. Change in plasma parameters in response to Npt2a inhibition.** Response to acute oral (p.o.) application of Npt2a-I (30 mg\*kg<sup>-1</sup> via oral gavage). (A) Phosphate, (B) calcium, (C) PTH, (D) FGF-23, (E) sodium, (F) chloride, (G) potassium, (H) blood pH and (i) blood bicarbonate. Data were analyzed by 2-way ANOVA followed by Tukey's multiple comparisons test and are expressed as mean±S.E.M.  $n=6-18$  (A-D),  $n=4$  (E-I). \* $P<0.05$  versus vehicle.

**Supplemental Figure 3. Npt2a-inhibition does not affect NHE3 and pS552-NHE3.**

Western blot analysis of NHE3 and pS552-NHE3 abundances in membrane fractions and total homogenates of kidneys from vehicle (V) or Npt2a inhibitor (I) treated mice (30 mg\*kg<sup>-1</sup>). NHE3 membrane and total abundances were not significantly affected 3 hours (A and B) or 24 hours (C and D) after Npt2a inhibitor treatment. Data were analyzed by unpaired Student t test and are expressed as mean±S.E.M, *n*=5-6. \**P*<0.05 versus vehicle.

**Supplemental Figure 4. Pathophysiological consequences of 5/6 nephrectomy (Nx).**

Effects on body weight (A), food intake (B), glomerular filtration rate (GFR, C), osmolality (D), fluid intake (E), urinary pH (F) and hematocrit (G). Data were analyzed by repeated measures 2-way ANOVA (A) and 2-way ANOVA (B-G) followed by Tukey's multiple comparisons test and are expressed as mean±S.E.M. *n*=11-12. §*P*<0.05 versus Sham.

**Supplemental Figure 5. Comparison of Npt2a inhibitor dose-response effects between Sham and 5/6 nephrectomy (Nx) mice.**

Response to acute oral (p.o.) application of Npt2a-I (0.3-300 mg\*kg<sup>-1</sup> via oral gavage) or vehicle in short-term (3 hour) metabolic cage experiments. (A) Sodium, (B) sodium/creatinine, (C) chloride, (D) chloride/creatinine, (E) urinary flow rate, (F) potassium, (G) potassium/creatinine, (H) urinary flow rate, (I) glucose, (J) glucose/creatinine and (K) urinary pH. The dose of 300 mg\*kg<sup>-1</sup> in 5/6 Nx mice was not included in the analysis because mice appeared lethargic after application. Data were analyzed by one-way ANOVA followed by Newman-Keuls multiple comparisons test and are expressed as mean±S.E.M. *n*=6-14/0.3-100 mg\*kg<sup>-1</sup>, *n*=4 for 300 mg\*kg<sup>-1</sup>. §*P*<0.05 versus Sham.

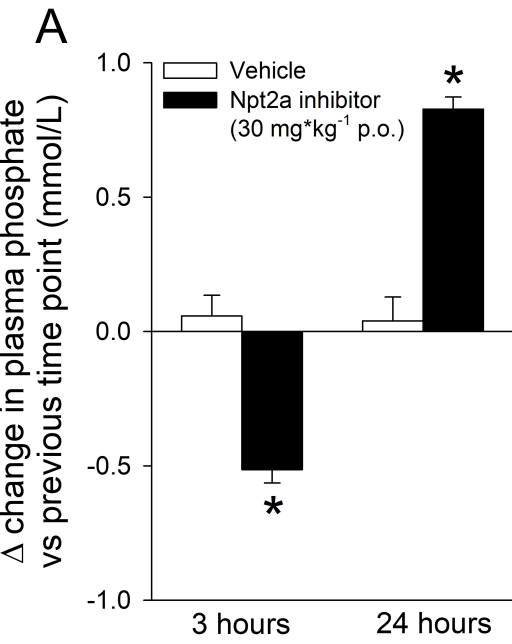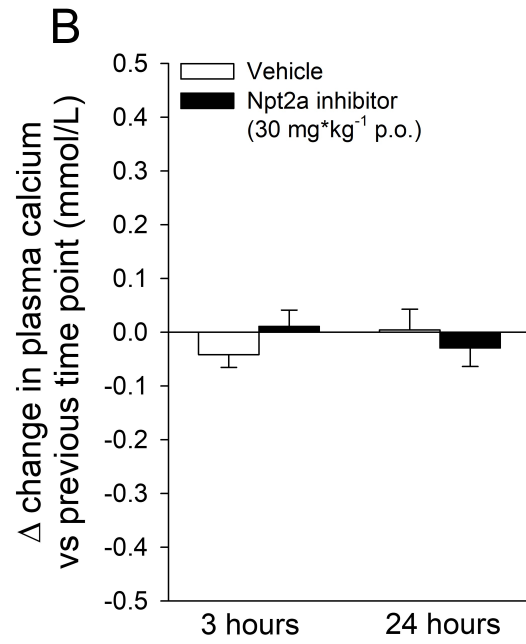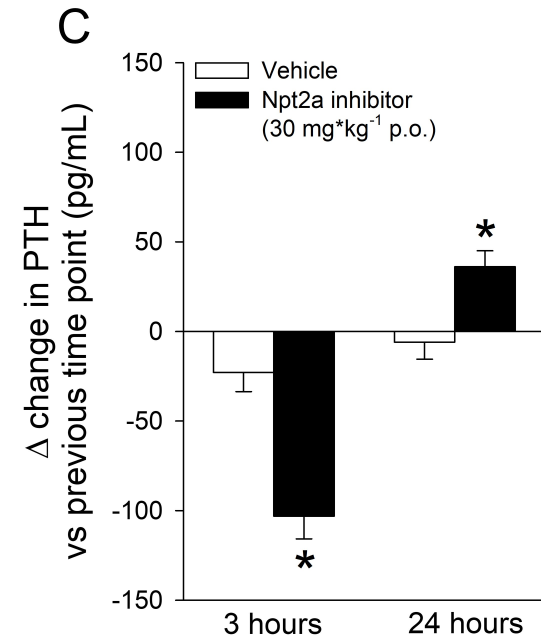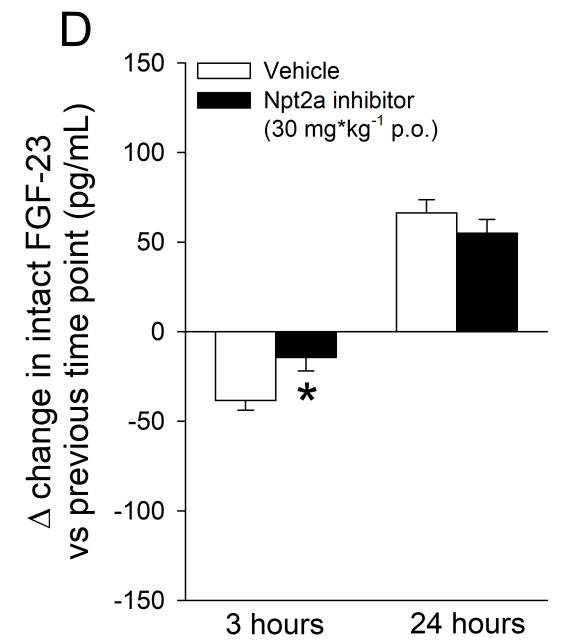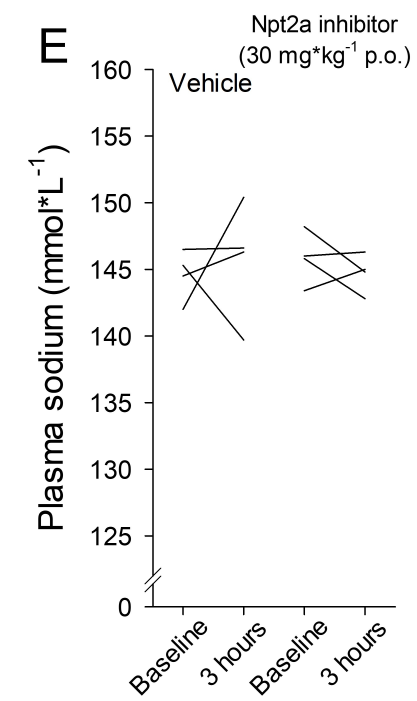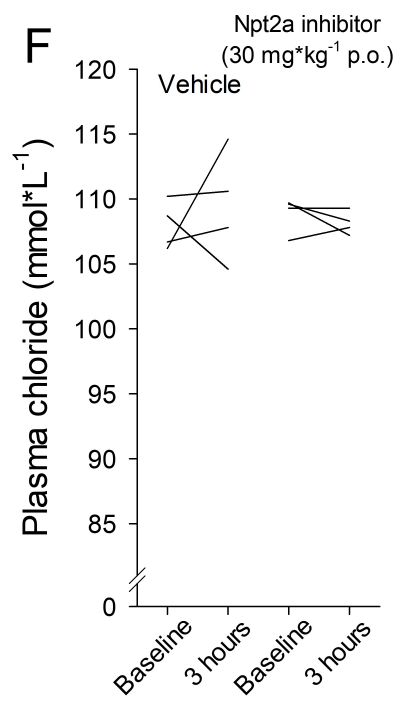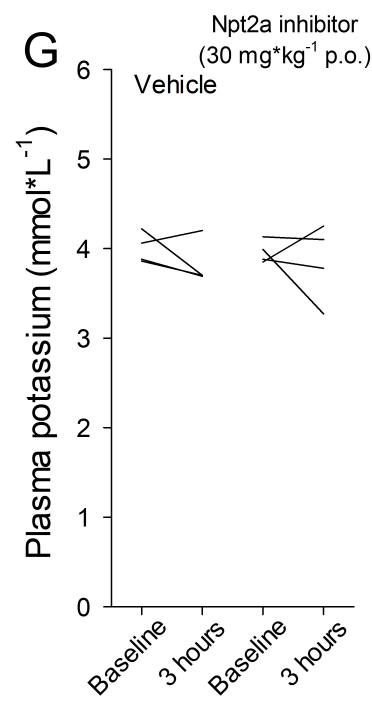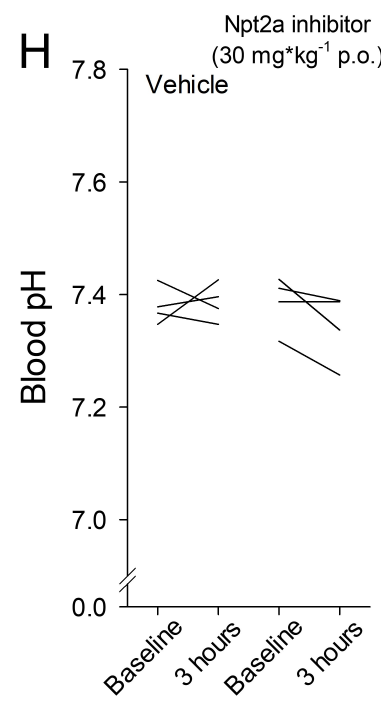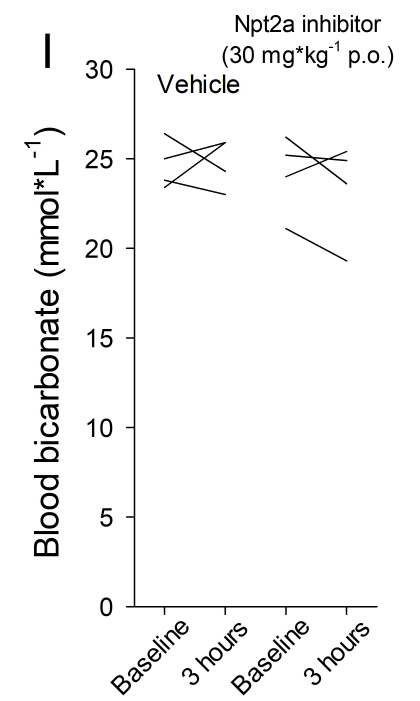

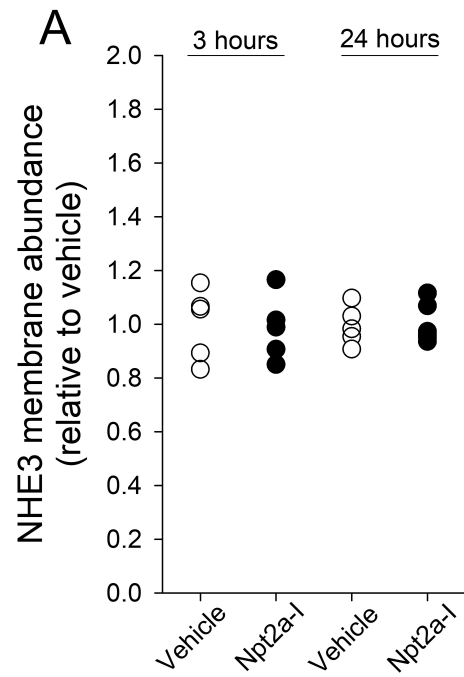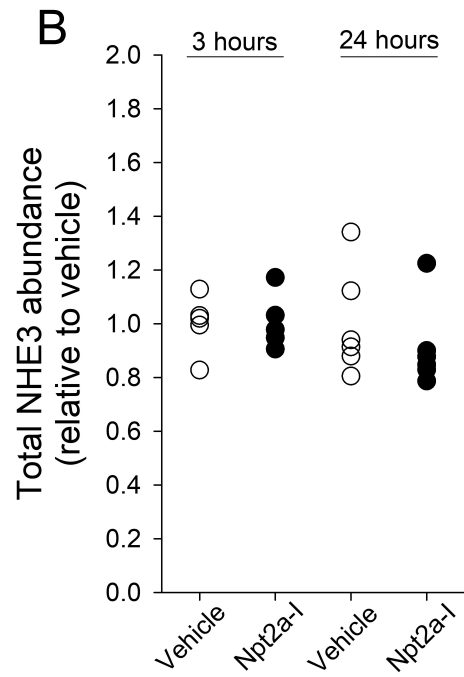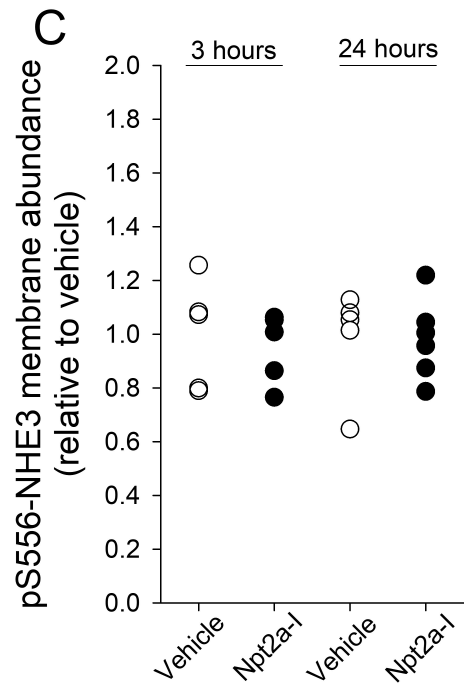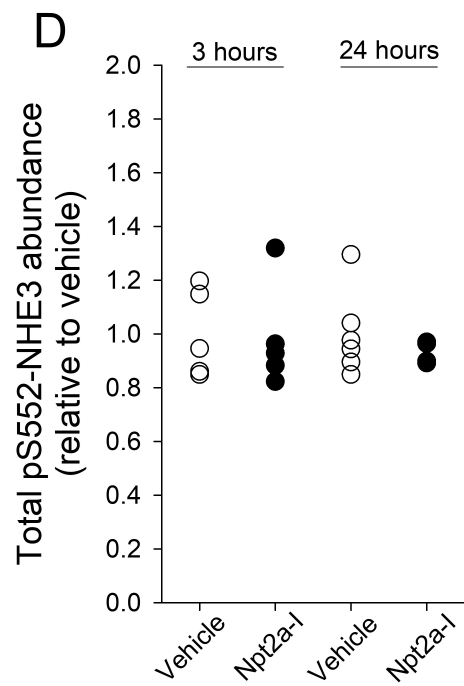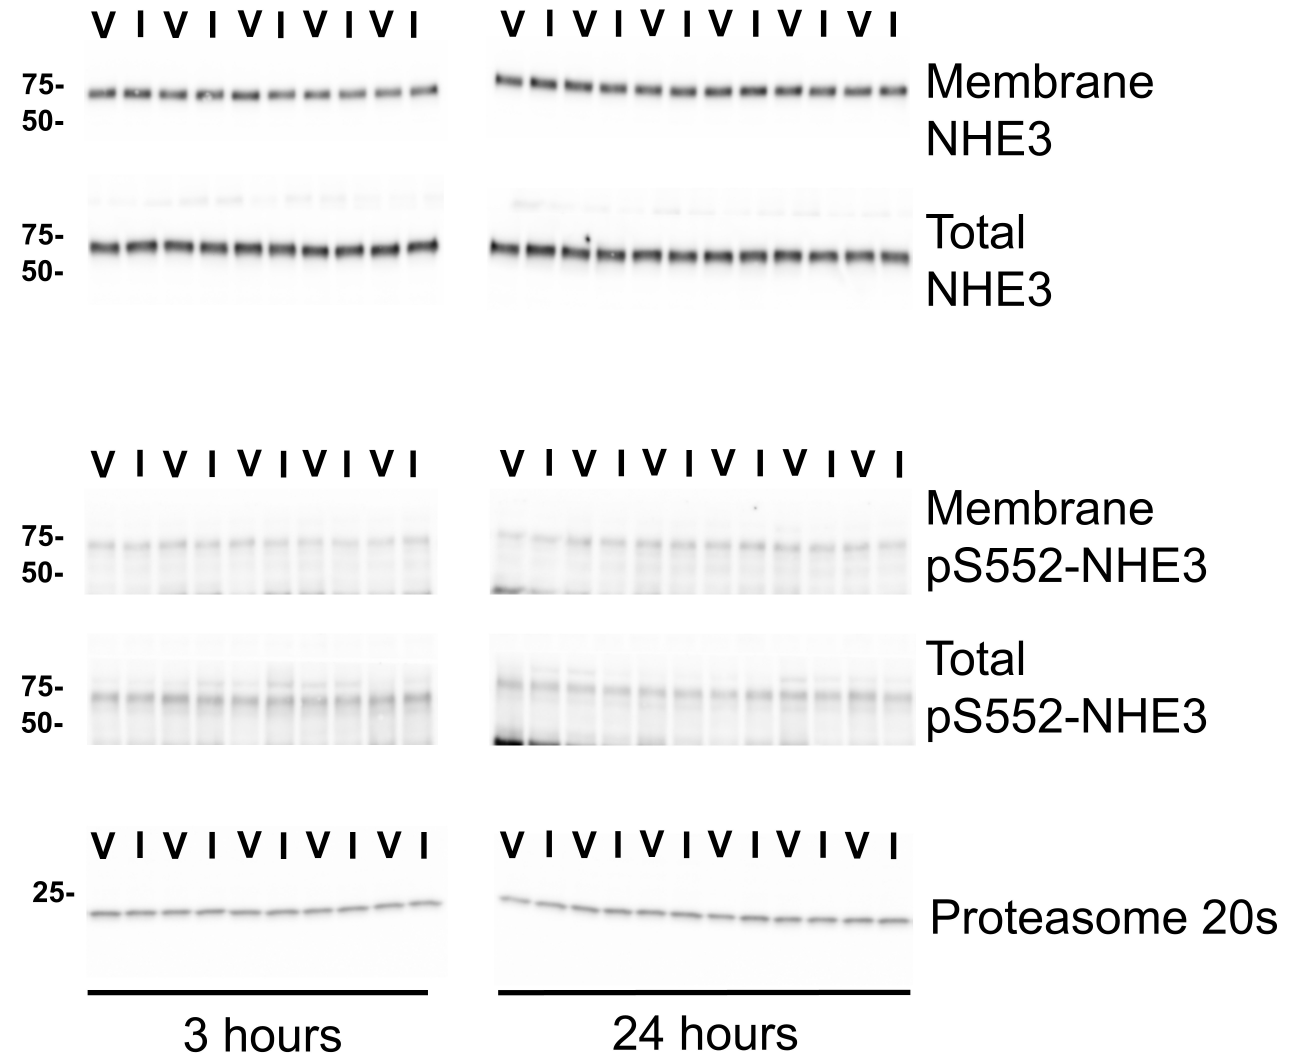

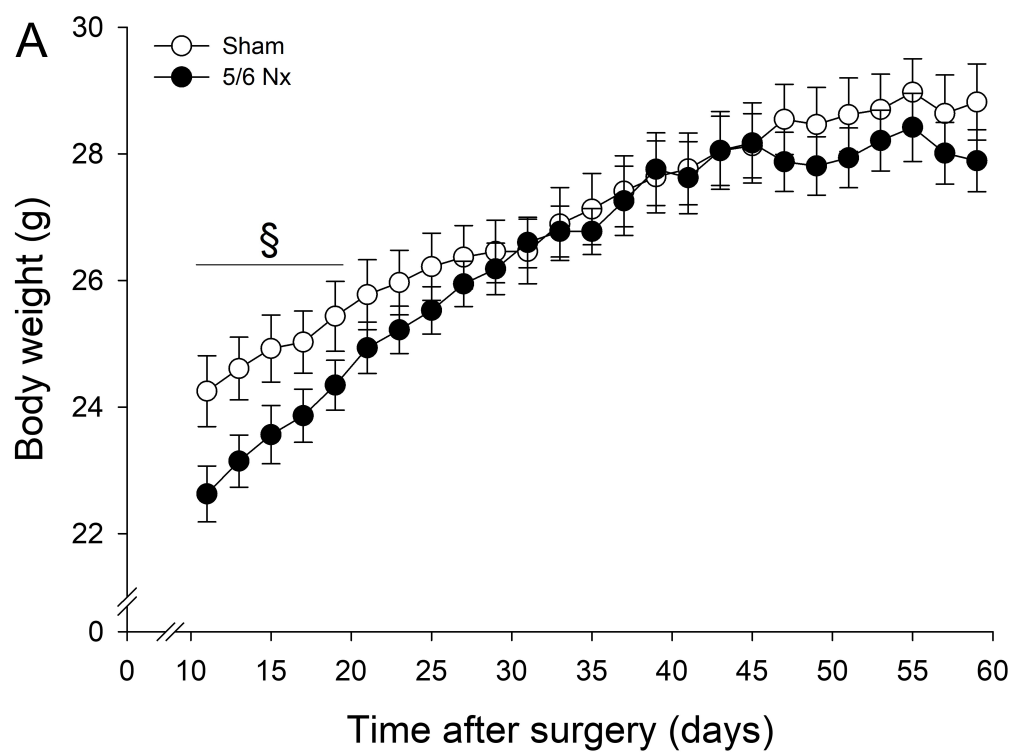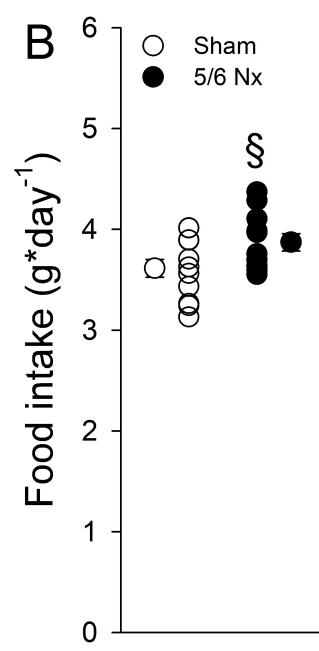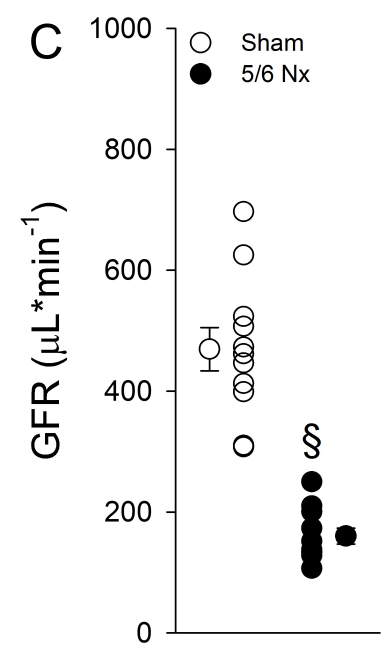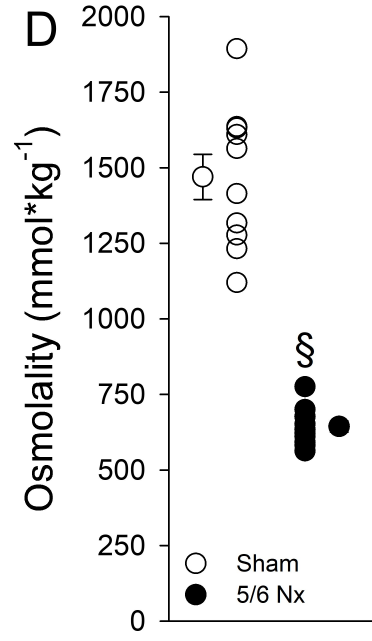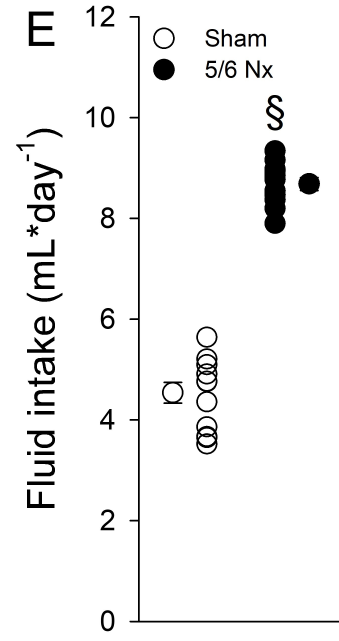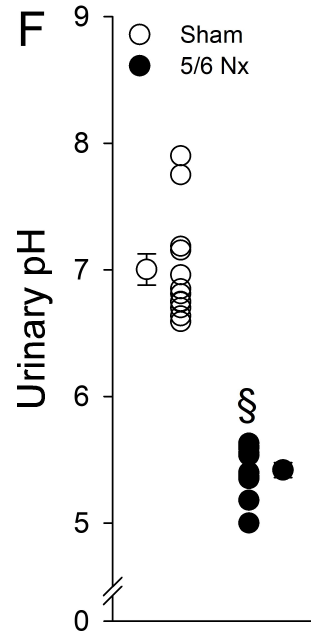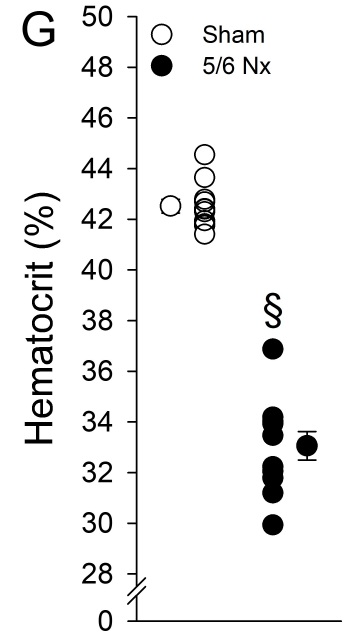

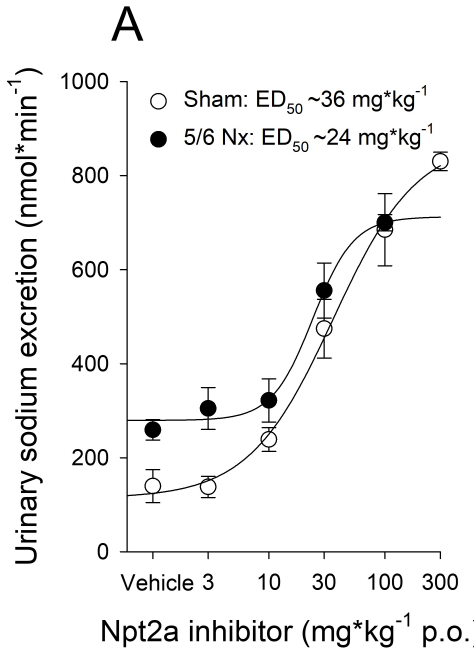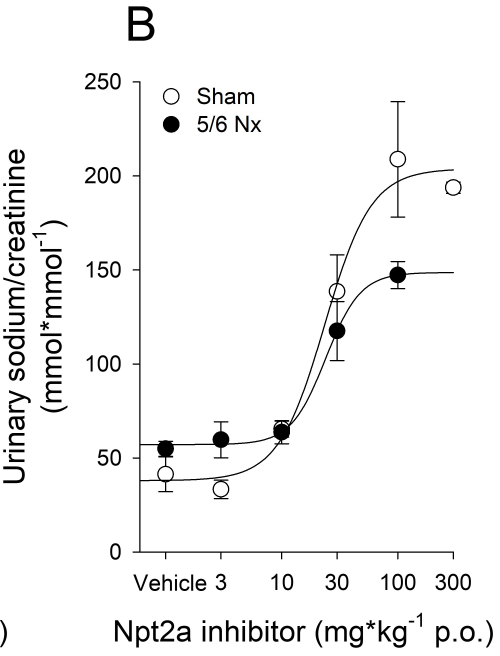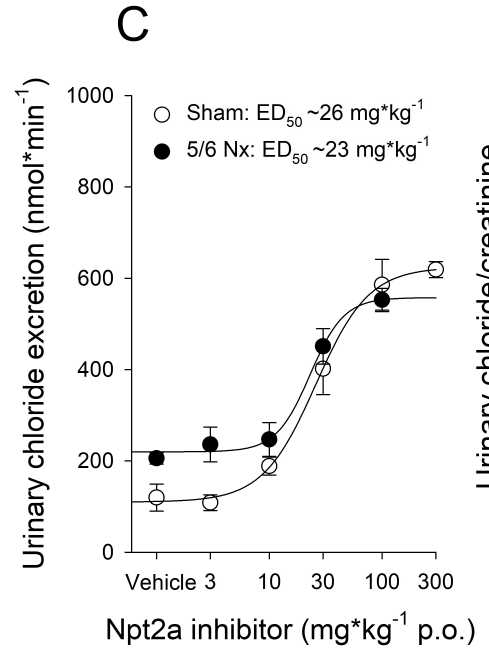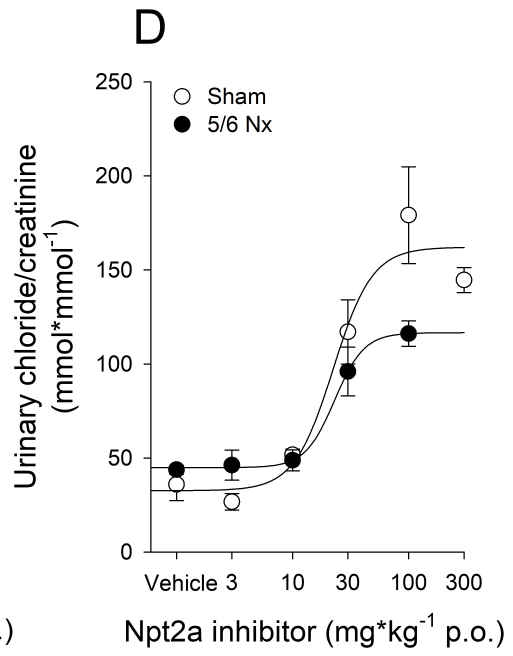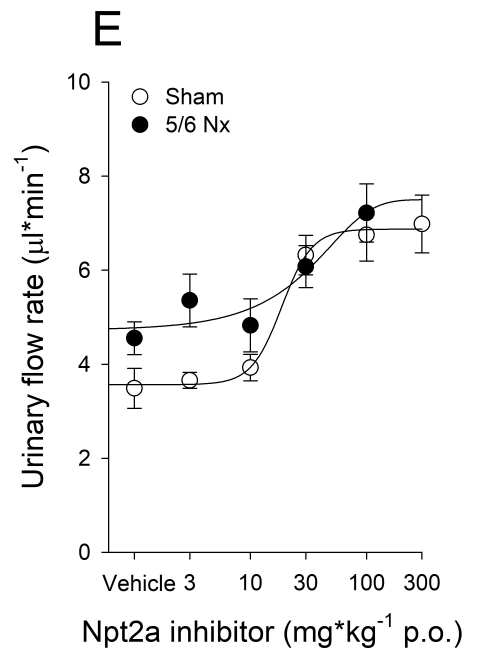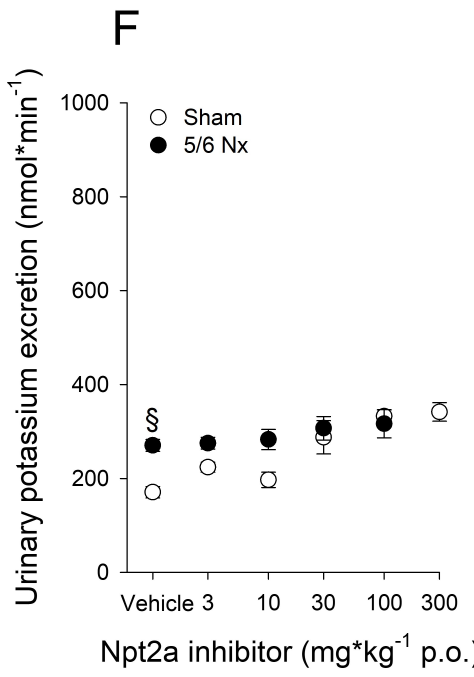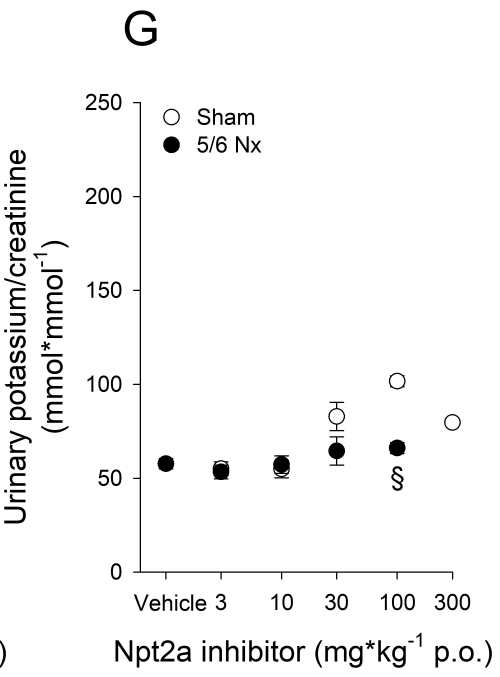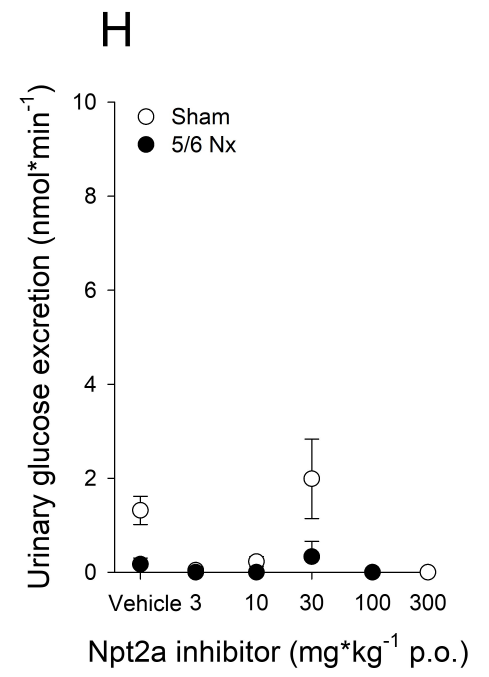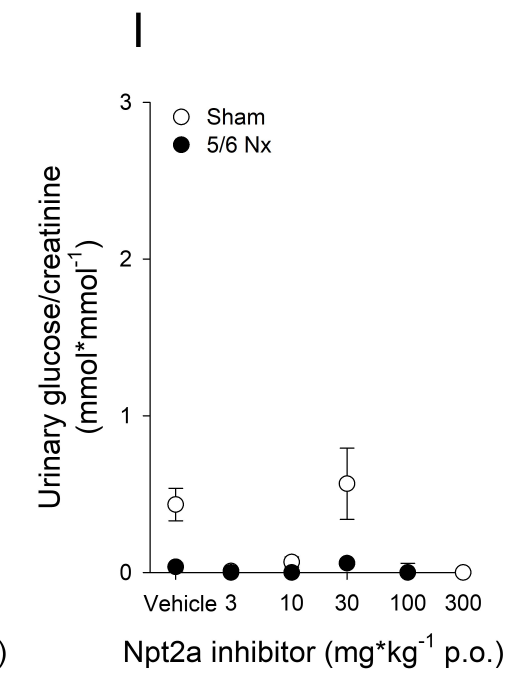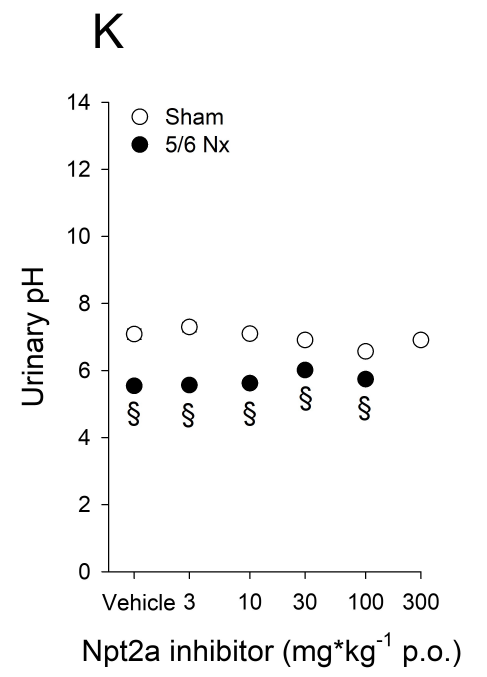

Supplement: ASN.2018121250SupplementaryData.pdf [file ASN.2018121250SupplementaryData.pdf]
